# Supplementary material
Source: PubMed Central journal article supplement (PMC4142638)
Supplement: NIHMS614622-supplement-ni_2890-S1.pdf [file NIHMS614622-supplement-ni_2890-S1.pdf]

## **Supplementary Information**

### **The transcription factor Foxp1 is a critical negative regulator of T follicular helper cell differentiation**

Haikun Wang<sup>1</sup>, Jianlin Geng<sup>1,6</sup>, Xiaomin Wen<sup>1,6</sup>, Enguang Bi<sup>1</sup>, Andrew V. Kossenkov<sup>1</sup>, Amaya I. Wolf<sup>1</sup>, Jeroen Tas<sup>2</sup>, Youn Soo Choi<sup>3</sup>, Hiroshi Takata<sup>1</sup>, Timothy J. Day<sup>1</sup>, Li-Yuan Chang<sup>1</sup>, Stephanie L. Sprout<sup>1</sup>, Emily K. Becker<sup>1</sup>, Jessica Willen<sup>1</sup>, Lifeng Tian<sup>1</sup>, Xinxin Wang<sup>1</sup>, Changchun Xiao<sup>4</sup>, Ping Jiang<sup>1</sup>, Shane Crotty<sup>3</sup>, Gabriel D. Victora<sup>2</sup>, Louise C. Showe<sup>1</sup>, Haley O. Tucker<sup>5</sup>, Jan Erikson<sup>1</sup> and Hui Hu<sup>1\*</sup>

<sup>1</sup>The Wistar Institute, Philadelphia, Pennsylvania;

<sup>2</sup>Whitehead Institute for Biomedical Research, Cambridge, Massachusetts;

<sup>3</sup>La Jolla Institute for Allergy & Immunology, La Jolla, California;

<sup>4</sup>Department of Immunology and Microbial Science, The Scripps Research Institute, La Jolla, California;

<sup>5</sup>Department of Molecular Genetics and The Institute for Cellular and Molecular Biology, The University of Texas at Austin, Texas;

<sup>6</sup>These authors contributed equally to this work and were listed in alphabetical order.

\*Correspondence and requests for materials should be addressed to H.H. (immhulab@gmail.com).

### **Supplementary Figures 1-11**

### **Supplementary Tables 1-2**

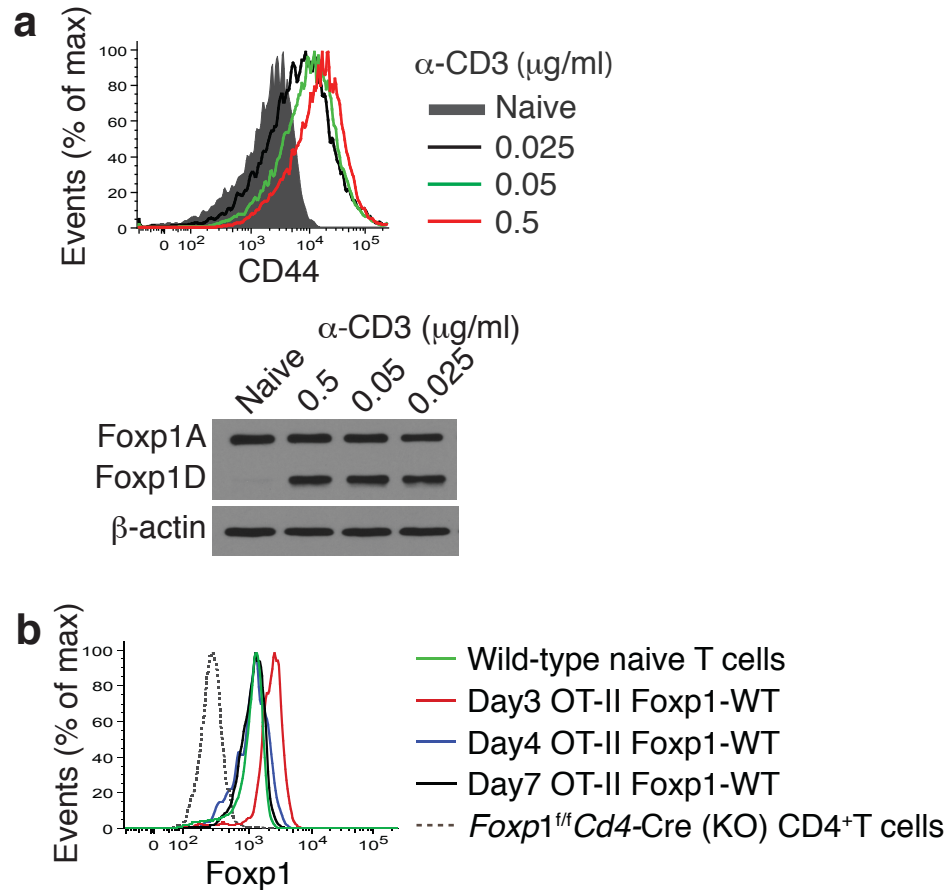

**Supplementary Fig. 1.** Foxp1D induction by TCR stimulation *in vitro* and *in vivo*. **(a)** Wild-type naive CD4<sup>+</sup> T cells were stimulated by plate-bound anti-CD3 antibodies at different concentrations for 48 hours, then analyzed by immunoblotting for Foxp1 expression and by staining for cell surface markers CD44. **(b)** Wild-type naive OT-II T cells were transferred into Ly5.1<sup>+</sup> C57BL/6 recipient mice followed by immunization with NP-OVA in alum. Foxp1 expression was analyzed by intracellular staining in donor OT-II T cells at different time points after immunization. *Foxp1<sup>fl/fl</sup>Cd4-Cre* (KO) CD4<sup>+</sup> T cells were used as controls. Results represent three **(a)** and two **(b)** independent experiments.

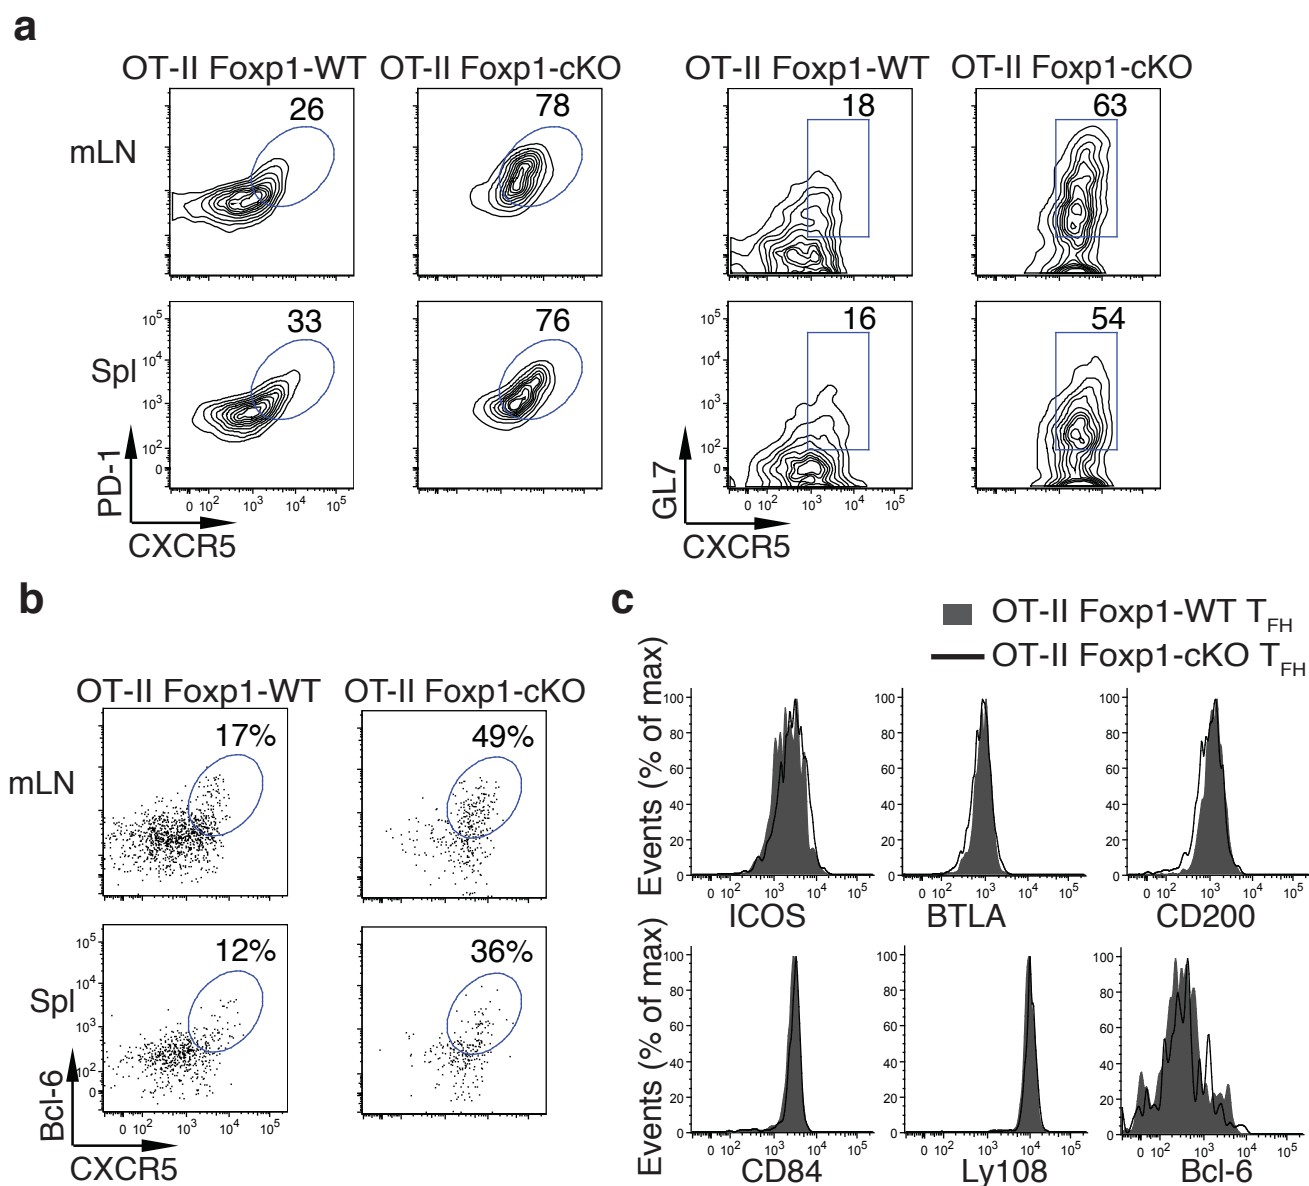

**Supplementary Fig. 2.** T<sub>FH</sub> cell differentiation of Foxp1-deficient OT-II T cells in Ly5.1<sup>+</sup> C57BL/6 recipient mice. Purified naive OT-II Foxp1-WT or OT-II Foxp1-cKO T cells were transferred into Ly5.1<sup>+</sup> C57BL/6 recipient mice followed by immunization with NP-OVA in alum. **(a)** Percentages of PD-1<sup>hi</sup>CXCR5<sup>hi</sup> T<sub>FH</sub> cells and GL7<sup>hi</sup>CXCR5<sup>hi</sup> GC T<sub>FH</sub> cells in splenic donor OT-II T cells 6 days after immunization. **(b)** Bcl-6 expression in donor OT-II T<sub>FH</sub> cells by intracellular staining 6 days after immunization. **(c)** Phenotypes of donor OT-II T<sub>FH</sub> cells by cell surface staining 6 days after immunization. Results represent at least two independent experiments.

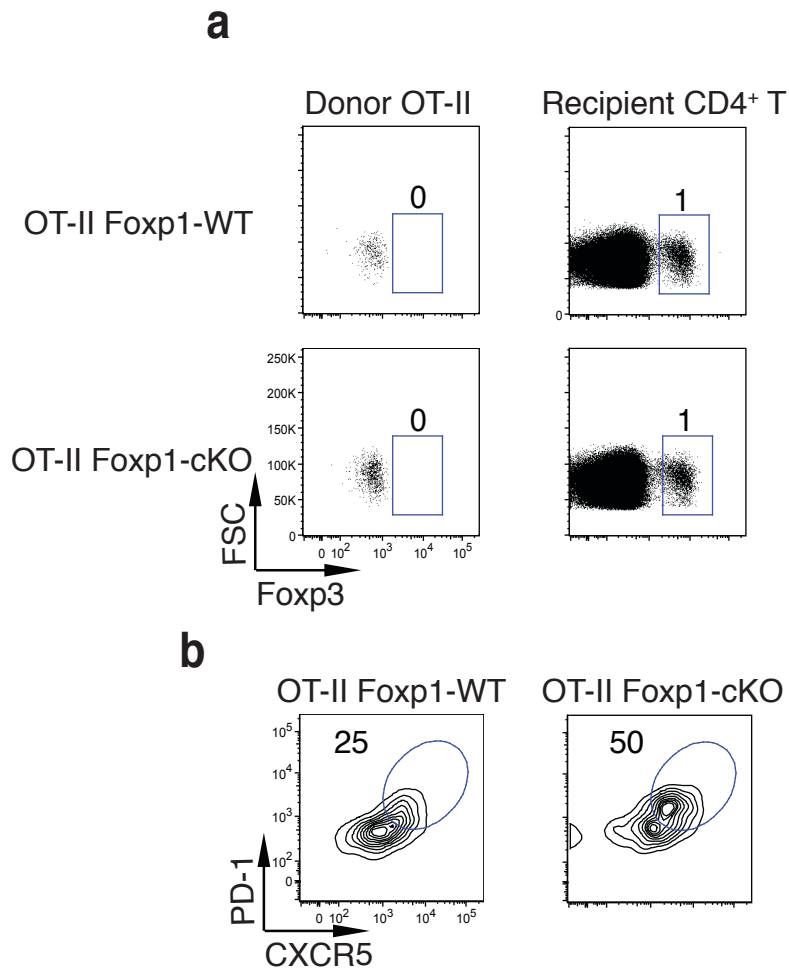

**Supplementary Fig. 3.** The effect of Foxp1 on T<sub>FH</sub> differentiation is cell-intrinsic. **(a)** Purified naive OT-II Foxp1-WT or OT-II Foxp1-cKO T cells were transferred into Ly5.1<sup>+</sup> SMARTA recipient mice followed by immunization with NP-OVA in alum. Foxp3 expression in splenic donor OT-II T cells and recipient CD4<sup>+</sup> T cells in SMARTA recipient mice were analyzed 6 days after immunization. **(b)** Naive OT-II Foxp1-WT and OT-II Foxp1-cKO T cells were mixed at 1:1 ratio and co-transferred into Ly5.1<sup>+</sup> C57BL/6 recipient mice followed by immunization with NP-OVA in alum. The percentage of T<sub>FH</sub> cells in donor OT-II T cells in the mLN of the recipient mice were analyzed 5 days after immunization. Results represent two independent experiments.

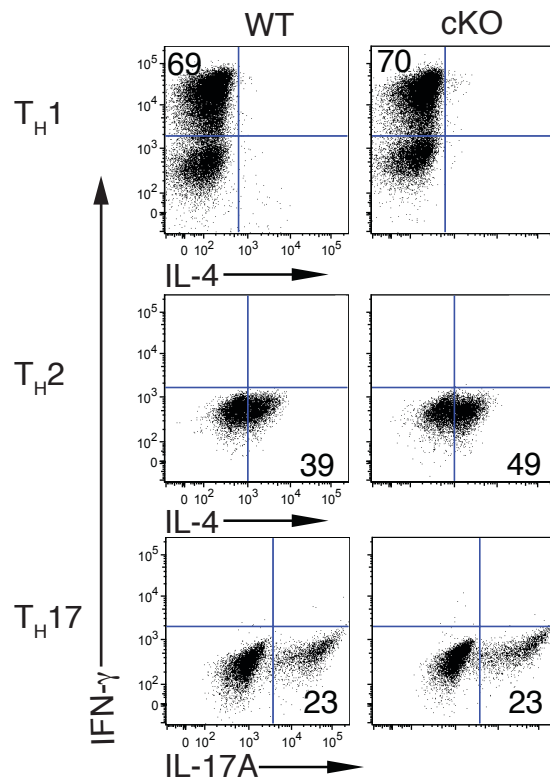

**Supplementary Fig. 4.** T<sub>H</sub>1, T<sub>H</sub>2 and T<sub>H</sub>17 differentiation of Foxp1-deficient CD4<sup>+</sup> T cells. Purified naive CD4<sup>+</sup> T cells from tamoxifen-treated *Foxp1<sup>fl/fl</sup>Rosa<sup>YFP</sup>* mice (WT) or *Foxp1<sup>fl/fl</sup>Cre-ERT2<sup>+</sup>Rosa<sup>YFP</sup>* mice (cKO) were stimulated by anti-CD3 and anti-CD28 antibodies under T<sub>H</sub>1-, T<sub>H</sub>2- or T<sub>H</sub>17-polarizing culture conditions for 2 days, followed by expansion in T cell medium with IL-2 for two more days. Cytokines were examined by intracellular staining. Results represent three independent experiments.

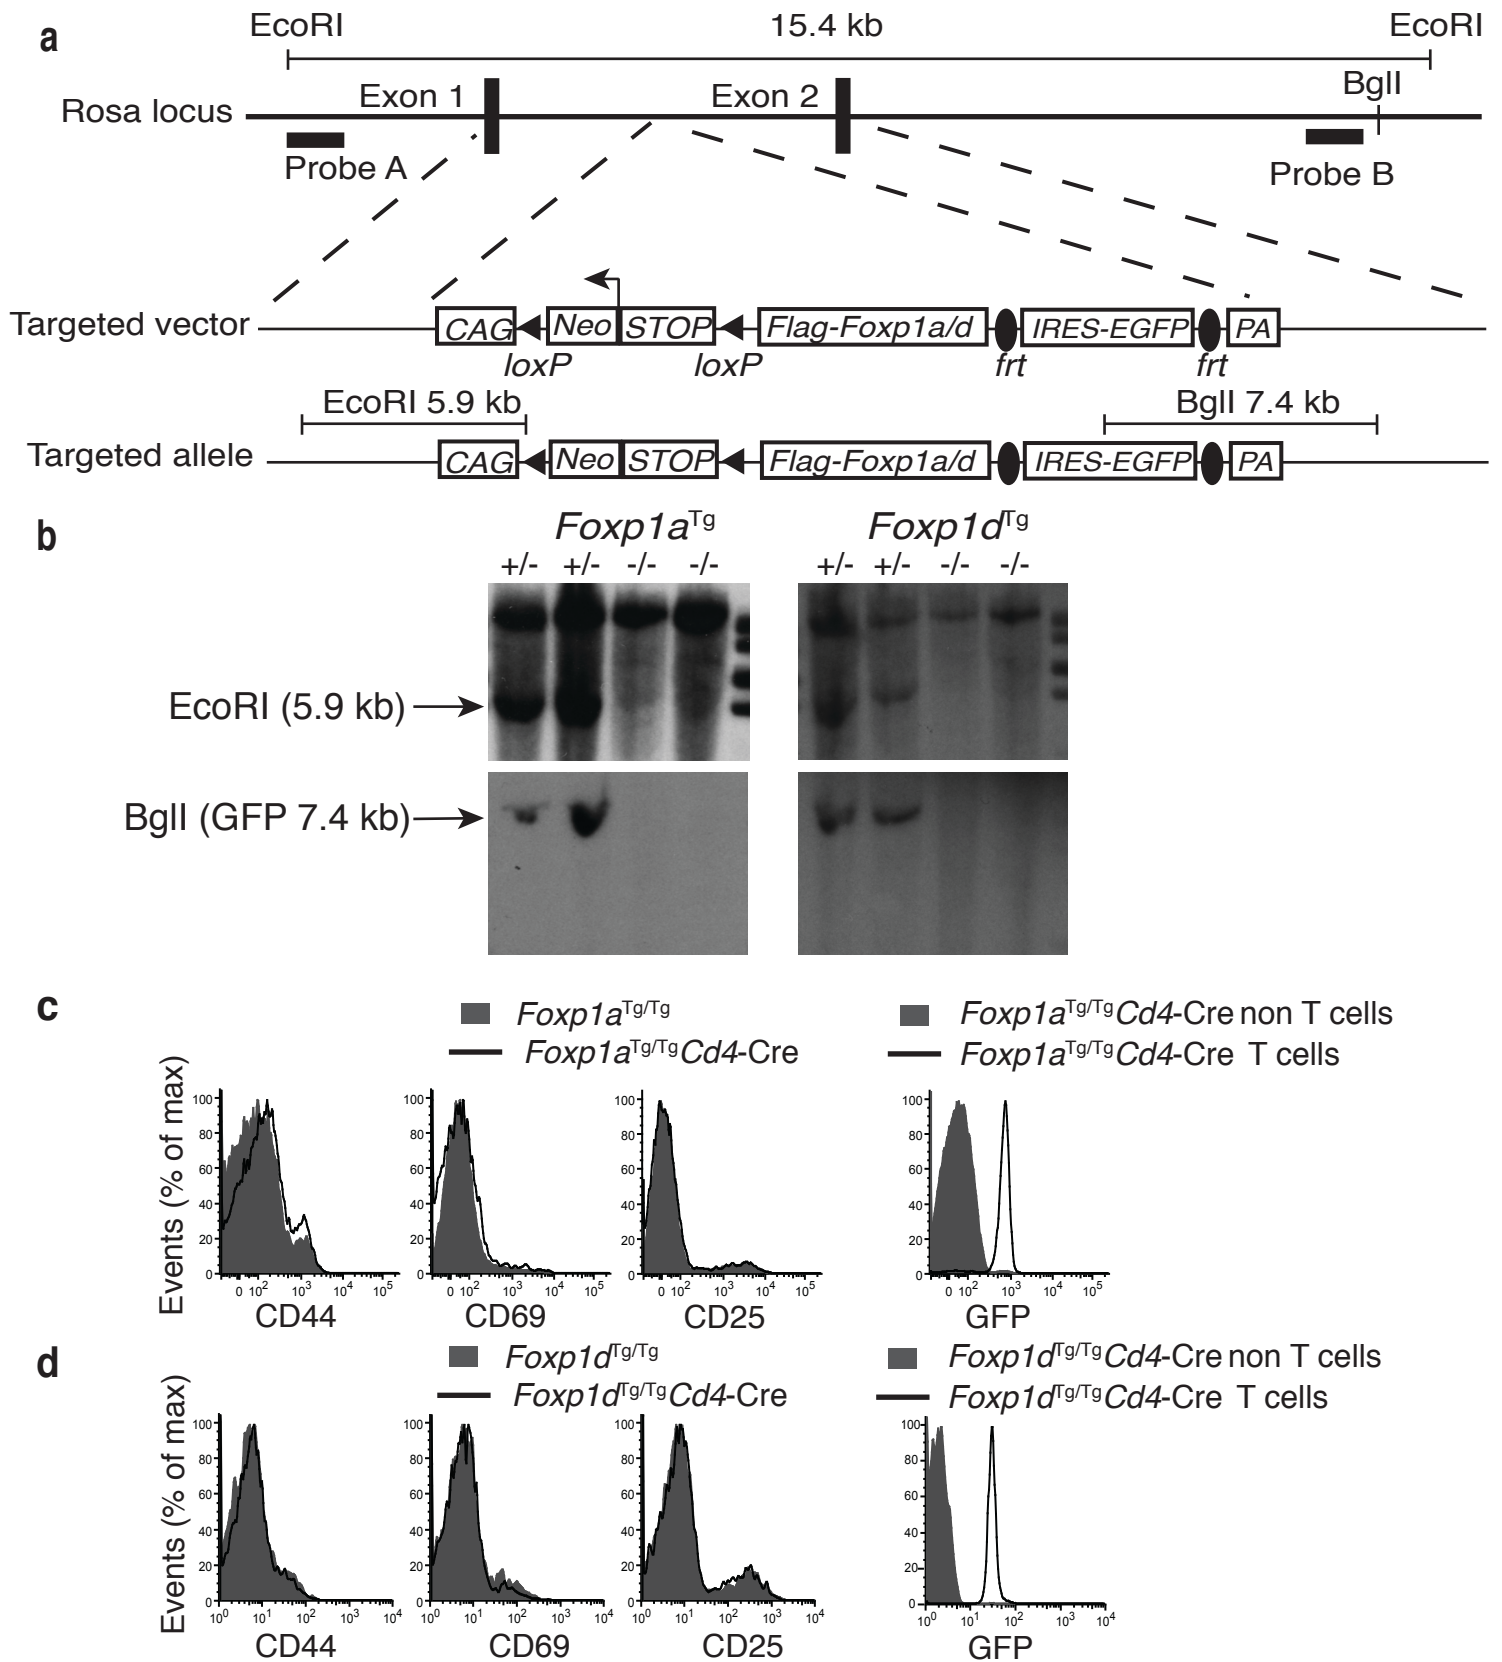

**Supplementary Fig. 5.** Generation of Foxp1A and Foxp1D conditional transgenic mice. **(a)** Schematic diagram of the targeting strategy for Foxp1A (*Foxp1a<sup>Tg/+</sup>*) or Foxp1D (*Foxp1d<sup>Tg/+</sup>*) conditional transgenic mice. **(b)** Southern blotting analyses of *Foxp1a<sup>Tg/+</sup>* and *Foxp1d<sup>Tg/+</sup>* mice. **(c)** Expression of cell surface markers and GFP in *Foxp1a<sup>Tg/Tg</sup>Cd4-Cre* CD4<sup>+</sup> T cells. **(d)** Expression of cell surface markers and GFP in *Foxp1d<sup>Tg/Tg</sup>Cd4-Cre* CD4<sup>+</sup> T cells. Results represent at least two independent experiments.

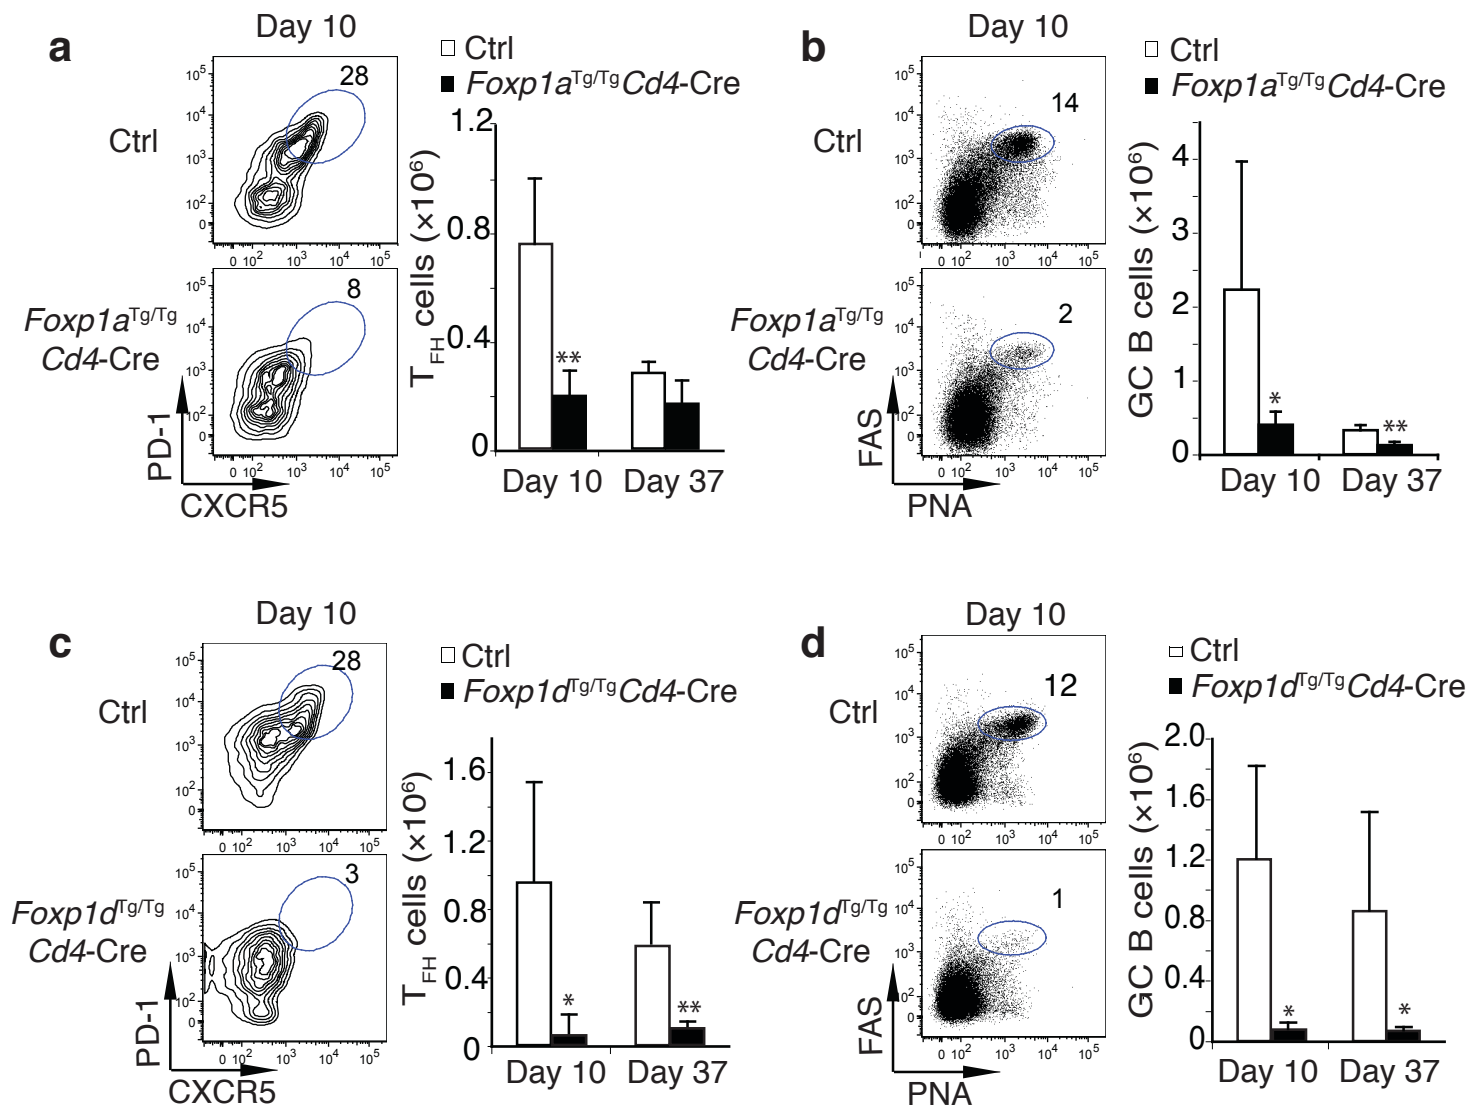

**Supplementary Fig. 6.** Both Foxp1A and Foxp1D negatively regulate T<sub>FH</sub> cell development. **(a, b)** *Foxp1a*<sup>Tg/Tg</sup>*Cd4-Cre* mice were infected with influenza virus PR8. The percentages and numbers of PD-1<sup>hi</sup>CXCR5<sup>hi</sup> T<sub>FH</sub> cells **(a)** and GC B cells **(b)** in the spleens of the infected mice were analyzed. *Foxp1a*<sup>Tg/Tg</sup> mice were used as controls. Error bars represent s.d. (n=5). **(c, d)** *Foxp1d*<sup>Tg/Tg</sup>*Cd4-Cre* mice were infected with PR8 virus. The percentages and numbers of CXCR5<sup>hi</sup>PD-1<sup>hi</sup> T<sub>FH</sub> cells **(c)** and GC B cells **(d)** in the spleens of the infected mice were analyzed. *Foxp1d*<sup>Tg/Tg</sup> mice were used as controls. Error bars represent s.d. (n=4). Results represent at least two independent experiments. \**P* < 0.05, \*\**P* < 0.01.

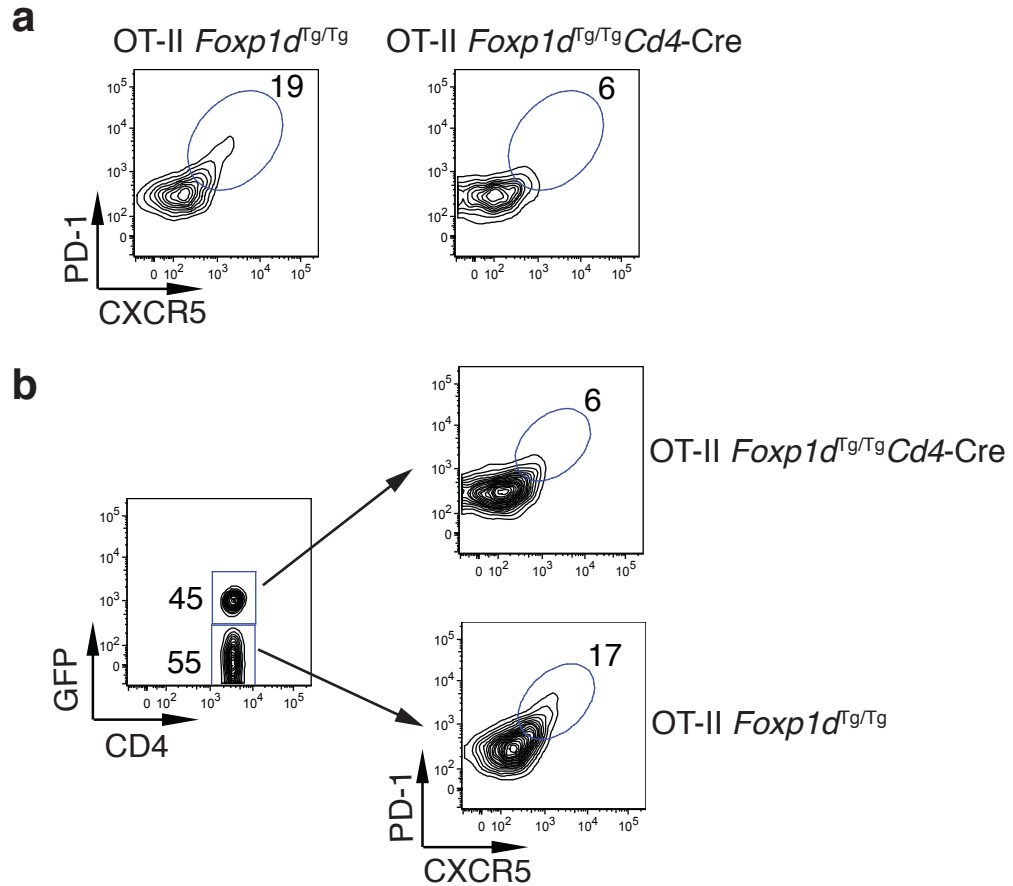

**Supplementary Fig. 7.** Transgenic expression of Foxp1D suppresses T<sub>FH</sub> cell differentiation but not the general CD4<sup>+</sup> T cell responses. **(a)** Purified naive CD4<sup>+</sup> T cells from OT-II *Foxp1d*<sup>Tg/Tg</sup>*Cd4-Cre* or control OT-II *Foxp1d*<sup>Tg/Tg</sup> mice were transferred into Ly5.1<sup>+</sup> C57BL/6 recipient mice followed by immunization with NP-OVA in alum. Seven days after immunization, the percentages of PD-1<sup>hi</sup>CXCR5<sup>hi</sup> T<sub>FH</sub> cells in splenic donor OT-II T cells were analyzed. **(b)** Purified naive CD4<sup>+</sup> T cells from OT-II *Foxp1d*<sup>Tg/Tg</sup>*Cd4-Cre* or control OT-II *Foxp1d*<sup>Tg/Tg</sup> mice were mixed at 1:1 ratio and co-transferred into Ly5.1<sup>+</sup> C57BL/6 recipient mice followed by immunization with NP-OVA in alum. The ratios of GFP<sup>+</sup> Foxp1D transgenic OT-II T cells to control OT-II and the percentages of T<sub>FH</sub> cells in splenic donor OT-II T cells were analyzed 7 days after immunization. Results represent two independent experiments.



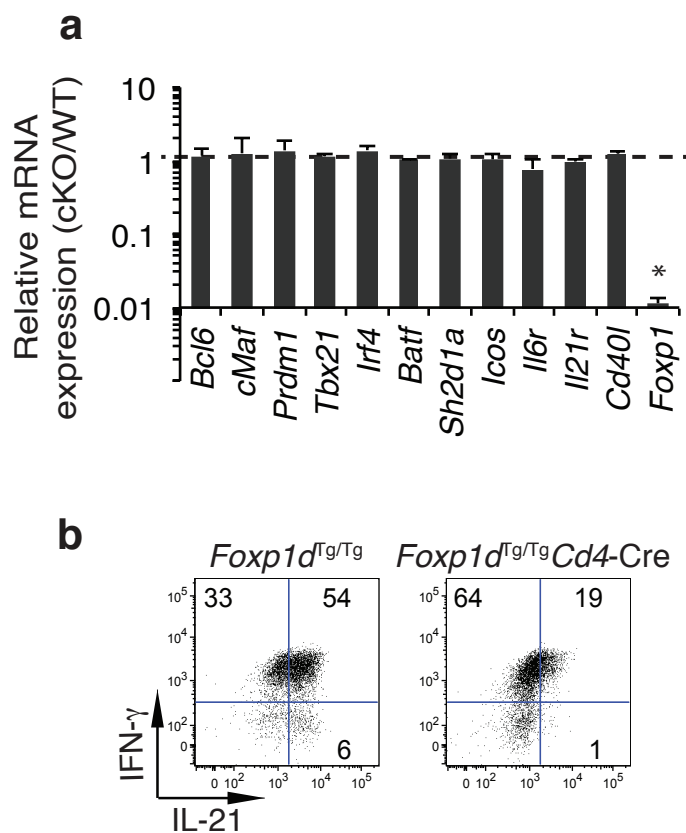

**Supplementary Fig. 8.** Expression of T<sub>FH</sub>-related genes in wild-type and Foxp1-deficient T<sub>FH</sub>-like cells *in vitro* and Foxp1D specifically inhibits IL-21 production *in vitro*. **(a)** Relative mRNA expression in wild-type and Foxp1-deficient T cells activated under T<sub>FH</sub>-like cell culture conditions *in vitro*. Error bars represent standard error of the mean (s.e.m.). **(b)** Wild-type (*Foxp1d<sup>Tg/Tg</sup>*) or Foxp1D transgenic (*Foxp1d<sup>Tg/Tg</sup>Cd4-Cre*) CD4<sup>+</sup> T cells were stimulated by anti-CD3 and anti-CD28 antibodies *in vitro* under T<sub>H</sub>1-polarizing culture conditions for three days and expanded for additional 2 days in medium. IL-21 production was examined on day 5 by intracellular staining.

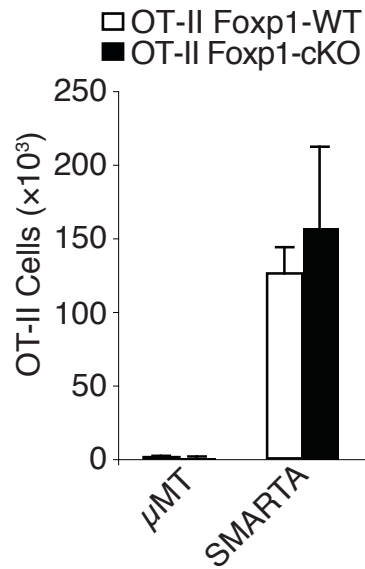

**Supplementary Fig. 9.** Recovery of donor OT-II T cells at the initial stage of the responses in B cell-deficient  $\mu$ MT recipient mice versus B cell-intact recipient mice. The day 3 data of total donor OT-II T cells in the spleens of the recipient mice of **Fig. 7b** and **Fig. 2a** are shown. Error bars represent s.d. ( $\mu$ MT recipients: n=2; SMARTA recipients: n=4). Results represent at least two independent experiments.

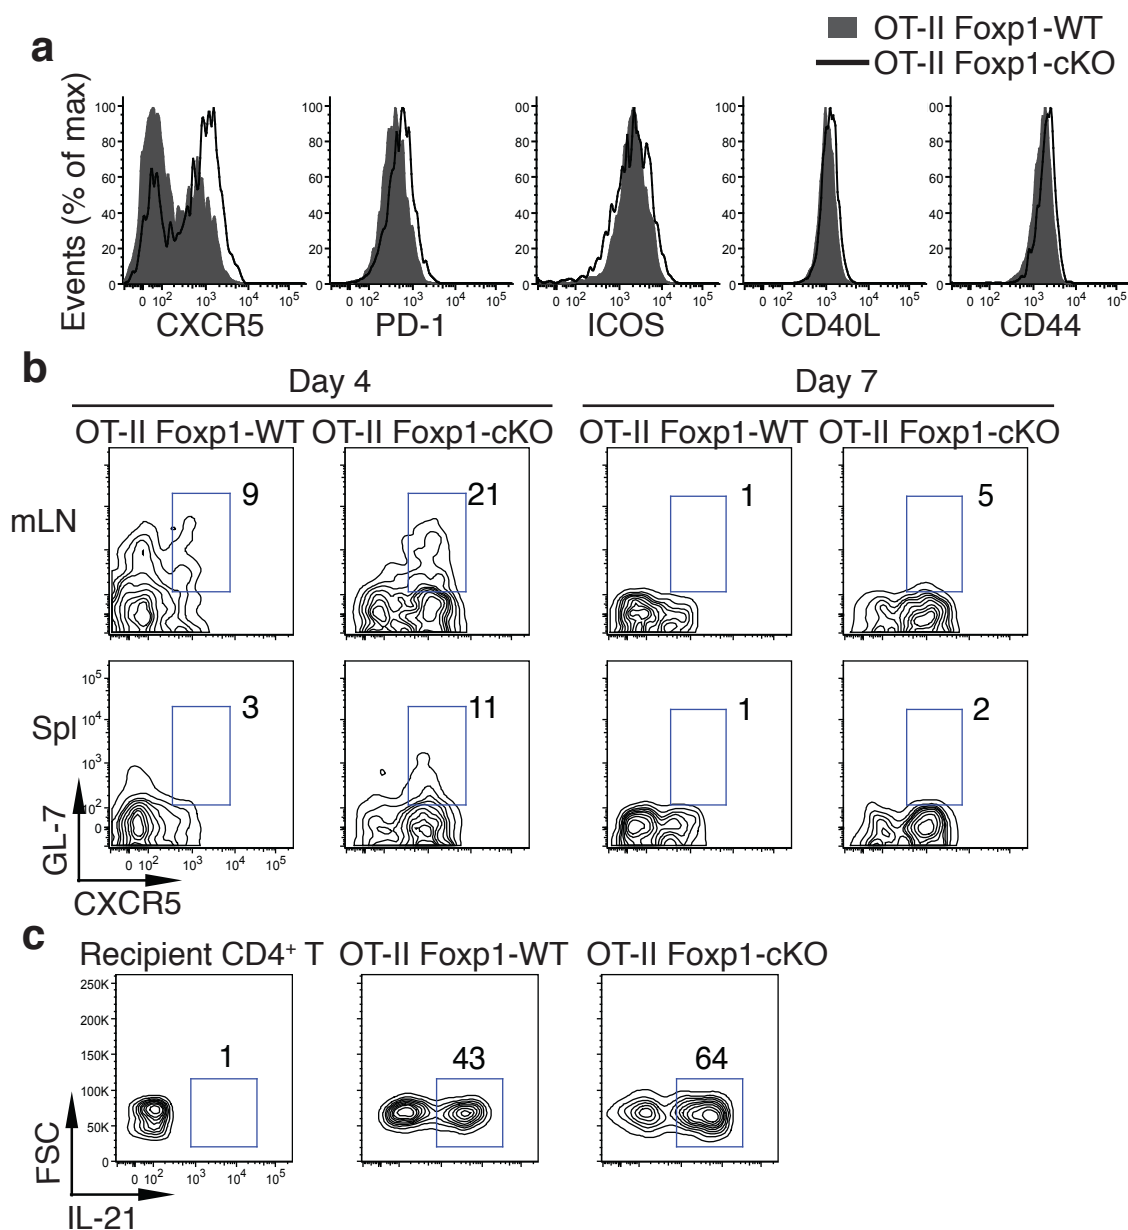

**Supplementary Fig. 10.** T<sub>FH</sub> cell differentiation of Foxp1-deficient CD4<sup>+</sup> T cells in  $\mu$ MT recipient mice. Purified naive OT-II Foxp1-WT and OT-II Foxp1-cKO T cells were transferred into  $\mu$ MT recipient mice followed by immunization with NP-OVA in alum. (a) Phenotypes of donor OT-II T cells in the spleens of the recipient mice 5 days after immunization. (b) Percentages of GL7<sup>hi</sup>CXCR5<sup>hi</sup> GC T<sub>FH</sub> cells in splenic donor OT-II T cells 4 and 7 days after immunization. (c) Percentages of IL-21-producing cells in day 5 splenic donor OT-II T cells by intracellular staining. Results represent at least two independent experiments.

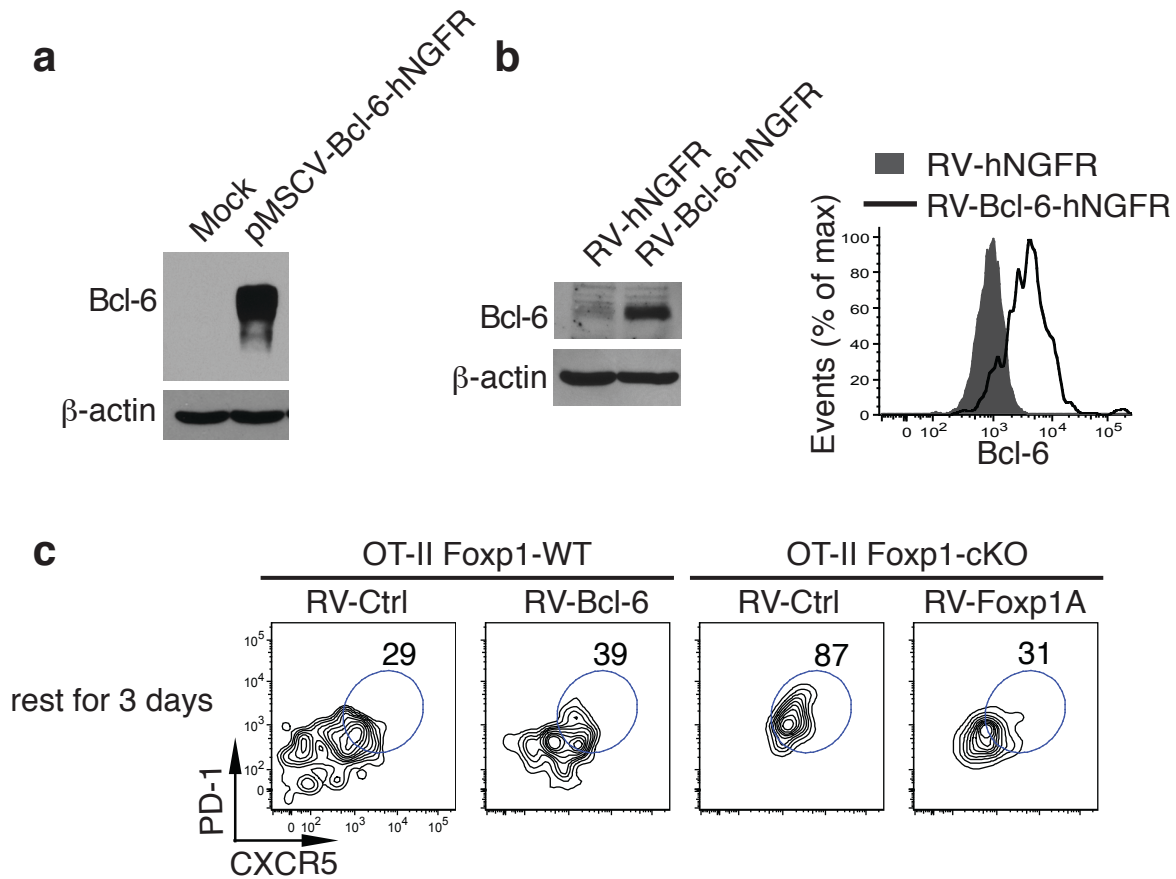

**Supplementary Fig. 11.** Retroviral over-expression of Bcl-6. **(a)** Immunoblotting of Bcl-6 in HEK293T cells transfected with plasmid MSCV-IRES-hNGFR (Mock) or MSCV-Bcl-6-hNGFR. **(b)** Immunoblotting (left panel) or intracellular staining (right panel) of Bcl-6 in CD4<sup>+</sup> T cells infected with RV-Ctrl or RV-Bcl-6 retroviruses. **(c)** Wild-type or Foxp1-deficient naive OT-II T cells transduced with RV-Ctrl, RV-Bcl-6, or RV-Foxp1A were transferred into Ly5.1<sup>+</sup> C57BL/6 recipient mice. Three days later, the recipient mice were immunized with NP-OVA in alum. T<sub>FH</sub> cell differentiation of hNGFR<sup>+</sup> cells in the mLN was analyzed 5 days after immunization. Results represent at least two independent experiments.

**Supplementary Table 1.** Expression and cKO/WT T<sub>FH</sub> fold change for 118 genes selected as T<sub>FH</sub> markers based on microarray data (m, shown as blue dots on scatter plot) and additional markers based on literature search (l).

| #  | IlluminaID   | Symbol              | m | l | cKO/WT<br>T <sub>FH</sub> | WT<br>n<br>1 | WT<br>T <sub>FH</sub><br>1 | WT<br>T <sub>FH</sub><br>2 | cKO<br>n<br>1 | cKO<br>T <sub>FH</sub><br>1 | cKO<br>T <sub>FH</sub><br>2 |
|----|--------------|---------------------|---|---|---------------------------|--------------|----------------------------|----------------------------|---------------|-----------------------------|-----------------------------|
| 1  | ILMN_1230353 | <i>Bcl6</i>         | y | y | 1.63                      | 11.1         | 12.7                       | 13.2                       | 11.8          | 13.6                        | 13.7                        |
| 2  | ILMN_2725464 | <i>SAP</i>          | y | y | 1.12                      | 12.9         | 13.8                       | 13.7                       | 12.8          | 14.0                        | 13.9                        |
| 3  | ILMN_2990494 | <i>Cxcr5</i>        | y | y | 1.18                      | 11.3         | 14.6                       | 14.2                       | 11.9          | 14.6                        | 14.7                        |
| 4  | ILMN_1260060 | <i>Pdcd1</i>        | y | y | 1.17                      | 8.4          | 9.1                        | 8.9                        | 8.5           | 9.1                         | 9.3                         |
| 5  | ILMN_2435486 | <i>Tnfrsf8</i>      | y | y | 1.60                      | 10.2         | 10.8                       | 10.8                       | 10.2          | 11.6                        | 11.5                        |
| 6  | ILMN_1215795 | <i>Il21</i>         | y | y | 2.80                      | 8.5          | 11.1                       | 11.2                       | 10.4          | 12.7                        | 12.5                        |
| 7  | ILMN_2931334 | <i>Il4</i>          | y | y | 1.33                      | 9.5          | 12.7                       | 13.5                       | 10.0          | 13.1                        | 13.9                        |
| 8  | ILMN_2630459 | <i>Cxcr4</i>        | y | y | 1.11                      | 10.4         | 11.1                       | 11.2                       | 10.2          | 11.0                        | 11.6                        |
| 9  | ILMN_2642800 | <i>Sostdc1</i>      | y |   | 5.98                      | 7.9          | 9.7                        | 10.0                       | 8.7           | 12.0                        | 12.8                        |
| 10 | ILMN_2758720 | <i>Sypl</i>         | y |   | 1.02                      | 11.9         | 12.4                       | 12.6                       | 11.9          | 12.5                        | 12.6                        |
| 11 | ILMN_2502471 | <i>BC023892</i>     | y |   | 0.82                      | 9.8          | 8.6                        | 9.1                        | 9.7           | 8.9                         | 8.1                         |
| 12 | ILMN_3161679 | <i>Serpini1</i>     | y |   | 0.79                      | 8.9          | 8.2                        | 8.3                        | 8.5           | 8.0                         | 7.8                         |
| 13 | ILMN_2886610 | <i>Txlnb</i>        | y |   | 1.20                      | 8.1          | 8.7                        | 8.7                        | 8.3           | 8.8                         | 9.1                         |
| 14 | ILMN_2718330 | <i>Cish</i>         | y |   | 1.29                      | 11.7         | 9.9                        | 10.2                       | 12.4          | 10.6                        | 10.3                        |
| 15 | ILMN_1217180 | <i>Ifitm1</i>       | y |   | 0.67                      | 10.9         | 9.8                        | 9.5                        | 11.0          | 9.3                         | 8.8                         |
| 16 | ILMN_1232766 | <i>Scpdpdh</i>      | y |   | 1.33                      | 9.5          | 11.9                       | 11.9                       | 9.4           | 12.1                        | 12.4                        |
| 17 | ILMN_2707181 | <i>Cd160</i>        | y |   | 1.11                      | 9.9          | 12.4                       | 12.3                       | 10.2          | 12.3                        | 12.7                        |
| 18 | ILMN_2645662 | <i>Tmem86a</i>      | y |   | 1.14                      | 8.8          | 9.5                        | 9.5                        | 8.8           | 9.5                         | 9.9                         |
| 19 | ILMN_2971286 | <i>Ppp3ca</i>       | y |   | 1.16                      | 11.6         | 10.5                       | 10.5                       | 11.8          | 10.9                        | 10.5                        |
| 20 | ILMN_2693403 | <i>Ela1</i>         | y |   | 1.00                      | 9.2          | 10.5                       | 10.7                       | 9.8           | 10.4                        | 10.8                        |
| 21 | ILMN_1255860 | <i>Klrd1</i>        | y |   | 1.07                      | 8.8          | 8.3                        | 8.3                        | 9.2           | 8.6                         | 8.2                         |
| 22 | ILMN_2902228 | <i>Coro2b</i>       | y |   | 1.15                      | 8.1          | 10.0                       | 9.8                        | 8.2           | 9.8                         | 10.4                        |
| 23 | ILMN_2651054 | <i>LOC100047173</i> | y |   | 0.82                      | 10.5         | 9.9                        | 9.9                        | 10.8          | 9.7                         | 9.5                         |
| 24 | ILMN_2589615 | <i>Ptrh1</i>        | y |   | 2.01                      | 9.9          | 11.4                       | 11.0                       | 10.9          | 12.3                        | 12.2                        |
| 25 | ILMN_1242024 | <i>Setd4</i>        | y |   | 1.15                      | 10.0         | 10.7                       | 10.9                       | 9.7           | 10.9                        | 11.1                        |
| 26 | ILMN_2764727 | <i>Actn2</i>        | y |   | 1.70                      | 10.1         | 9.0                        | 8.9                        | 11.0          | 9.6                         | 9.9                         |
| 27 | ILMN_1232537 | <i>Arl4c</i>        | y |   | 0.78                      | 12.6         | 10.4                       | 11.1                       | 12.2          | 10.6                        | 10.1                        |
| 28 | ILMN_1221620 | <i>Il18rap</i>      | y |   | 0.89                      | 8.9          | 8.2                        | 8.0                        | 9.2           | 7.9                         | 7.9                         |
| 29 | ILMN_2721399 | <i>Ctsw</i>         | y |   | 0.92                      | 10.4         | 9.2                        | 8.8                        | 11.4          | 9.1                         | 8.7                         |
| 30 | ILMN_2430813 | <i>Pdlim7</i>       | y |   | 1.01                      | 11.2         | 12.1                       | 12.1                       | 11.0          | 11.9                        | 12.3                        |
| 31 | ILMN_1254653 | <i>Angptl2</i>      | y |   | 0.87                      | 8.5          | 10.5                       | 9.8                        | 8.5           | 9.9                         | 9.9                         |
| 32 | ILMN_2909782 | <i>Rras2</i>        | y |   | 1.08                      | 10.2         | 9.6                        | 9.7                        | 10.9          | 9.9                         | 9.6                         |
| 33 | ILMN_2605819 | <i>Egln3</i>        | y |   | 2.32                      | 10.8         | 11.7                       | 11.5                       | 11.7          | 12.8                        | 12.9                        |
| 34 | ILMN_1232901 | <i>Vamp5</i>        | y |   | 1.36                      | 9.0          | 10.0                       | 9.8                        | 9.4           | 10.1                        | 10.6                        |
| 35 | ILMN_3159170 | <i>Cd22</i>         | y |   | 0.71                      | 8.3          | 9.6                        | 9.4                        | 9.0           | 9.0                         | 9.0                         |
| 36 | ILMN_2637113 | <i>Slc9a9</i>       | y |   | 0.81                      | 10.9         | 12.0                       | 11.6                       | 10.7          | 11.5                        | 11.5                        |
| 37 | ILMN_3111877 | <i>Rbms2</i>        | y |   | 1.35                      | 11.4         | 12.5                       | 12.6                       | 11.3          | 12.8                        | 13.1                        |

|    |              |                      |   |      |      |      |      |      |      |      |
|----|--------------|----------------------|---|------|------|------|------|------|------|------|
| 38 | ILMN_2445166 | <i>Vdr</i>           | y | 1.21 | 8.5  | 10.8 | 10.0 | 9.1  | 10.2 | 11.2 |
| 39 | ILMN_2642403 | <i>Lmo4</i>          | y | 1.78 | 11.8 | 13.1 | 13.5 | 12.6 | 13.8 | 14.5 |
| 40 | ILMN_2615559 | <i>Dab2ip</i>        | y | 1.14 | 7.9  | 8.7  | 9.0  | 8.1  | 8.9  | 9.2  |
| 41 | ILMN_2631514 | <i>BC017612</i>      | y | 0.91 | 11.3 | 13.1 | 12.2 | 11.6 | 12.3 | 12.7 |
| 42 | ILMN_1224186 | <i>Ica11</i>         | y | 1.58 | 8.4  | 9.3  | 9.5  | 9.0  | 10.0 | 10.1 |
| 43 | ILMN_2588051 | <i>Tubb2b</i>        | y | 1.31 | 8.5  | 11.1 | 10.1 | 9.1  | 11.0 | 11.0 |
| 44 | ILMN_2788073 | <i>Hmox1</i>         | y | 0.38 | 8.9  | 11.1 | 9.9  | 9.5  | 9.3  | 8.9  |
| 45 | ILMN_2696629 | <i>Itgal</i>         | y | 1.15 | 12.3 | 13.1 | 12.9 | 12.6 | 13.0 | 13.4 |
| 46 | ILMN_1232028 | <i>Itga4</i>         | y | 0.67 | 11.9 | 11.5 | 11.4 | 11.7 | 11.3 | 10.4 |
| 47 | ILMN_2701355 | <i>Nanos1</i>        | y | 1.47 | 9.0  | 9.6  | 9.8  | 9.0  | 10.1 | 10.4 |
| 48 | ILMN_2765759 | <i>Asb2</i>          | y | 1.14 | 11.2 | 13.5 | 14.0 | 11.7 | 13.6 | 14.3 |
| 49 | ILMN_1255220 | <i>Atp9a</i>         | y | 0.99 | 7.9  | 9.4  | 8.7  | 7.9  | 8.6  | 9.4  |
| 50 | ILMN_2754717 | <i>Pear1</i>         | y | 0.70 | 9.5  | 10.5 | 10.1 | 9.1  | 9.7  | 9.8  |
| 51 | ILMN_1225303 | <i>Tox2</i>          | y | 0.95 | 7.7  | 8.4  | 8.2  | 7.9  | 8.3  | 8.2  |
| 52 | ILMN_2743902 | <i>Matk</i>          | y | 0.75 | 10.0 | 11.5 | 12.0 | 9.7  | 10.9 | 11.7 |
| 53 | ILMN_1221920 | <i>Plekhg3</i>       | y | 1.25 | 10.1 | 11.7 | 12.4 | 11.1 | 12.0 | 12.8 |
| 54 | ILMN_2984744 | <i>Emp3</i>          | y | 0.51 | 14.6 | 14.0 | 13.9 | 14.3 | 13.1 | 12.9 |
| 55 | ILMN_2750011 | <i>Galnt10</i>       | y | 1.16 | 12.8 | 12.0 | 11.8 | 12.8 | 12.3 | 11.9 |
| 56 | ILMN_2635232 | <i>LOC100046953</i>  | y | 0.83 | 9.4  | 8.6  | 8.7  | 10.5 | 8.4  | 8.4  |
| 57 | ILMN_2594139 | <i>6330403K07Rik</i> | y | 2.13 | 9.2  | 10.2 | 11.1 | 10.6 | 11.3 | 12.2 |
| 58 | ILMN_2613923 | <i>Popdc2</i>        | y | 0.54 | 9.1  | 10.1 | 10.2 | 9.4  | 9.2  | 9.3  |
| 59 | ILMN_2789862 | <i>B4galnt4</i>      | y | 1.15 | 8.1  | 9.7  | 9.7  | 9.1  | 9.7  | 10.1 |
| 60 | ILMN_2419138 | <i>Vcl</i>           | y | 1.05 | 10.0 | 8.2  | 8.7  | 9.9  | 8.7  | 8.3  |
| 61 | ILMN_2458765 | <i>Ahnak</i>         | y | 0.64 | 14.4 | 13.6 | 13.5 | 14.5 | 13.1 | 12.7 |
| 62 | ILMN_2744492 | <i>Nhs11</i>         | y | 1.07 | 7.8  | 8.4  | 8.5  | 7.6  | 8.4  | 8.8  |
| 63 | ILMN_2777598 | <i>Nr2f6</i>         | y | 0.79 | 9.3  | 10.2 | 10.1 | 9.4  | 9.6  | 10.1 |
| 64 | ILMN_2952650 | <i>Klrb1c</i>        | y | 0.90 | 8.6  | 9.6  | 10.0 | 8.7  | 9.5  | 9.8  |
| 65 | ILMN_2988143 | <i>Plac8</i>         | y | 0.37 | 13.6 | 11.8 | 11.1 | 12.6 | 10.5 | 9.6  |
| 66 | ILMN_2795791 | <i>Tmem38b</i>       | y | 0.78 | 11.7 | 12.2 | 12.3 | 11.5 | 12.0 | 11.8 |
| 67 | ILMN_2749448 | <i>Plekho2</i>       | y | 0.80 | 11.7 | 12.2 | 12.1 | 11.8 | 11.8 | 11.9 |
| 68 | ILMN_1253691 | <i>B430201A12Rik</i> | y | 0.89 | 9.2  | 8.3  | 8.6  | 8.6  | 8.5  | 8.1  |
| 69 | ILMN_2653215 | <i>Nagk</i>          | y | 0.78 | 11.0 | 11.8 | 11.6 | 10.7 | 11.2 | 11.4 |
| 70 | ILMN_1254927 | <i>Ly6c1</i>         | y | 0.93 | 9.8  | 9.1  | 8.7  | 10.0 | 9.0  | 8.7  |
| 71 | ILMN_1246725 | <i>Mrps6</i>         | y | 1.12 | 12.8 | 13.6 | 13.6 | 13.0 | 13.6 | 14.0 |
| 72 | ILMN_2612255 | <i>Lyl1</i>          | y | 0.96 | 7.8  | 8.4  | 8.5  | 8.1  | 8.6  | 8.3  |
| 73 | ILMN_2909597 | <i>Havcr2</i>        | y | 0.99 | 8.3  | 7.8  | 7.8  | 8.5  | 7.9  | 7.7  |
| 74 | ILMN_2813454 | <i>Dnajc15</i>       | y | 0.92 | 13.1 | 12.4 | 12.1 | 13.4 | 12.1 | 12.0 |
| 75 | ILMN_2747196 | <i>Cd82</i>          | y | 1.06 | 13.5 | 14.3 | 14.1 | 14.0 | 14.1 | 14.4 |
| 76 | ILMN_2548010 | <i>Hopx</i>          | y | 0.91 | 9.9  | 8.8  | 9.2  | 9.4  | 8.9  | 8.8  |
| 77 | ILMN_2852904 | <i>Ublep1</i>        | y | 0.74 | 11.0 | 12.1 | 11.7 | 10.8 | 11.4 | 11.5 |
| 78 | ILMN_2911788 | <i>Tmprss13</i>      | y | 0.70 | 9.7  | 8.7  | 8.3  | 9.0  | 8.2  | 7.8  |
| 79 | ILMN_2713464 | <i>Abhd4</i>         | y | 0.75 | 9.0  | 10.0 | 9.8  | 8.7  | 9.3  | 9.6  |
| 80 | ILMN_2819859 | <i>Tbc1d2b</i>       | y | 0.94 | 12.1 | 13.0 | 12.7 | 12.1 | 12.6 | 12.9 |

|     |              |                      |   |      |      |      |      |      |      |      |
|-----|--------------|----------------------|---|------|------|------|------|------|------|------|
| 81  | ILMN_2589662 | <i>Bmp7</i>          | y | 0.66 | 10.9 | 11.6 | 11.5 | 10.3 | 10.7 | 11.2 |
| 82  | ILMN_2909275 | <i>Slc46a1</i>       | y | 0.98 | 7.7  | 8.5  | 8.3  | 7.8  | 8.2  | 8.6  |
| 83  | ILMN_3143621 | <i>2610020H08Rik</i> | y | 1.04 | 10.0 | 8.8  | 9.1  | 9.7  | 8.8  | 9.1  |
| 84  | ILMN_3026198 | <i>Rnaset2b</i>      | y | 0.95 | 15.0 | 15.8 | 15.6 | 14.7 | 15.4 | 15.8 |
| 85  | ILMN_2765513 | <i>Kif3a</i>         | y | 0.94 | 8.8  | 9.6  | 9.4  | 9.1  | 9.5  | 9.4  |
| 86  | ILMN_1235374 | <i>Decr1</i>         | y | 1.02 | 9.0  | 9.8  | 9.9  | 9.3  | 9.7  | 10.0 |
| 87  | ILMN_2773900 | <i>Glpr2</i>         | y | 0.89 | 13.3 | 12.3 | 12.2 | 13.7 | 12.1 | 12.1 |
| 88  | ILMN_2789077 | <i>Itgb1</i>         | y | 1.54 | 10.2 | 8.9  | 9.2  | 10.8 | 10.0 | 9.4  |
| 89  | ILMN_1228822 | <i>Tsga14</i>        | y | 0.91 | 10.8 | 11.5 | 11.4 | 10.7 | 11.3 | 11.4 |
| 90  | ILMN_1248650 | <i>2900027G03Rik</i> | y | 1.02 | 8.5  | 9.2  | 9.0  | 8.4  | 9.0  | 9.3  |
| 91  | ILMN_1218504 | <i>Chdh</i>          | y | 0.87 | 9.0  | 9.7  | 9.9  | 8.6  | 9.4  | 9.8  |
| 92  | ILMN_2843394 | <i>Ptgir</i>         | y | 0.65 | 9.7  | 9.2  | 9.0  | 9.5  | 8.4  | 8.6  |
| 93  | ILMN_2733073 | <i>Ryr1</i>          | y | 1.13 | 9.1  | 10.3 | 10.3 | 9.7  | 10.4 | 10.6 |
| 94  | ILMN_2706819 | <i>Rasl11b</i>       | y | 0.80 | 10.2 | 8.9  | 8.8  | 9.4  | 8.5  | 8.5  |
| 95  | ILMN_2634859 | <i>Nek4</i>          | y | 1.01 | 8.1  | 8.6  | 8.5  | 8.2  | 8.4  | 8.7  |
| 96  | ILMN_1239210 | <i>Scn11a</i>        | y | 7.86 | 7.4  | 8.1  | 8.4  | 9.2  | 10.9 | 11.6 |
| 97  | ILMN_1235657 | <i>Rnase4</i>        | y | 0.87 | 8.0  | 9.4  | 8.7  | 8.0  | 8.7  | 9.0  |
| 98  | ILMN_1220101 | <i>Ebi2</i>          | y | 0.73 | 13.0 | 14.0 | 13.8 | 12.4 | 13.5 | 13.4 |
| 99  | ILMN_2695181 | <i>Smtn</i>          | y | 0.69 | 11.9 | 13.5 | 12.9 | 11.6 | 12.4 | 13.0 |
| 100 | ILMN_2748941 | <i>Itfg3</i>         | y | 0.71 | 9.6  | 10.7 | 10.4 | 9.7  | 10.0 | 10.2 |
| 101 | ILMN_1223317 | <i>Lgals3</i>        | y | 0.88 | 10.9 | 10.2 | 10.2 | 12.7 | 10.5 | 9.5  |
| 102 | ILMN_2759933 | <i>Gna15</i>         | y | 0.76 | 10.9 | 10.0 | 9.6  | 11.0 | 9.4  | 9.5  |
| 103 | ILMN_3125606 | <i>D12Ert647e</i>    | y | 0.88 | 13.3 | 14.3 | 14.1 | 13.1 | 13.8 | 14.2 |
| 104 | ILMN_2416764 | <i>Cacna1d</i>       | y | 0.67 | 11.0 | 12.6 | 12.5 | 10.1 | 11.8 | 12.1 |
| 105 | ILMN_2686975 | <i>Fam129b</i>       | y | 0.90 | 9.0  | 8.4  | 8.4  | 10.0 | 8.3  | 8.2  |
| 106 | ILMN_2759762 | <i>Stard10</i>       | y | 0.66 | 9.8  | 11.0 | 10.8 | 9.4  | 10.1 | 10.5 |
| 107 | ILMN_1228557 | <i>Id2</i>           | y | 1.55 | 10.8 | 9.1  | 9.6  | 11.6 | 10.1 | 9.9  |
| 108 | ILMN_2664224 | <i>Ephx1</i>         | y | 0.88 | 12.7 | 14.2 | 14.3 | 11.8 | 13.8 | 14.3 |
| 109 | ILMN_1217043 | <i>LOC100047762</i>  | y | 1.24 | 9.2  | 8.6  | 8.6  | 9.1  | 9.0  | 8.7  |
| 110 | ILMN_2974064 | <i>Osbpl3</i>        | y | 1.36 | 10.2 | 11.0 | 10.9 | 10.8 | 11.2 | 11.6 |
| 111 | ILMN_2699531 | <i>Rgs10</i>         | y | 0.97 | 14.7 | 15.3 | 15.3 | 14.2 | 15.3 | 15.2 |
| 112 | ILMN_1214364 | <i>E430004N04Rik</i> | y | 1.09 | 11.9 | 11.3 | 11.3 | 11.6 | 11.7 | 11.2 |
| 113 | ILMN_1254409 | <i>Atxn1</i>         | y | 1.22 | 11.7 | 9.9  | 10.4 | 11.1 | 11.0 | 9.9  |
| 114 | ILMN_2737940 | <i>Grtp1</i>         | y | 1.04 | 7.6  | 8.3  | 8.4  | 7.6  | 8.3  | 8.4  |
| 115 | ILMN_2760963 | <i>Dock6</i>         | y | 0.74 | 10.4 | 11.4 | 11.5 | 9.8  | 11.1 | 10.9 |
| 116 | ILMN_1234698 | <i>Tspan2</i>        | y | 0.75 | 9.4  | 8.6  | 8.6  | 8.7  | 8.2  | 8.1  |
| 117 | ILMN_2767615 | <i>Atp1b1</i>        | y | 1.06 | 9.2  | 10.2 | 9.8  | 9.3  | 9.9  | 10.2 |
| 118 | ILMN_2677824 | <i>Susd4</i>         | y | 0.93 | 7.7  | 8.4  | 8.6  | 7.7  | 8.2  | 8.6  |
| 119 | ILMN_3116935 | <i>Btla</i>          | y | 1.14 | 13.5 | 13.7 | 14.0 | 13.7 | 14.0 | 14.0 |
| 120 | ILMN_2655721 | <i>Stat1</i>         | y | 1.36 | 13.6 | 13.3 | 13.3 | 13.2 | 13.9 | 13.6 |
| 121 | ILMN_2906430 | <i>Icos</i>          | y | 1.26 | 13.5 | 13.4 | 13.3 | 13.7 | 13.7 | 13.7 |
| 122 | ILMN_2608184 | <i>Il6st</i>         | y | 0.90 | 11.6 | 12.3 | 12.3 | 11.0 | 12.0 | 12.4 |
| 123 | ILMN_1248843 | <i>Gata3</i>         | y | 1.91 | 12.4 | 10.2 | 12.1 | 12.2 | 12.0 | 12.2 |

|            |              |                 |   |      |      |      |      |      |      |      |
|------------|--------------|-----------------|---|------|------|------|------|------|------|------|
| <b>124</b> | ILMN_2446559 | <i>Tnfrsf4</i>  | y | 0.99 | 11.7 | 11.4 | 11.3 | 12.2 | 11.4 | 11.4 |
| <b>125</b> | ILMN_1214255 | <i>Cd200</i>    | y | 0.75 | 11.4 | 11.8 | 11.7 | 10.6 | 11.6 | 11.1 |
| <b>126</b> | ILMN_2740678 | <i>Slamf6</i>   | y | 0.83 | 10.5 | 11.6 | 11.5 | 10.5 | 10.9 | 11.6 |
| <b>127</b> | ILMN_2623699 | <i>Irf4</i>     | y | 1.10 | 11.9 | 11.1 | 10.9 | 12.3 | 11.1 | 11.1 |
| <b>128</b> | ILMN_1243741 | <i>Rora</i>     | y | 0.95 | 11.5 | 10.6 | 11.3 | 11.9 | 10.9 | 10.7 |
| <b>129</b> | ILMN_2976191 | <i>Stat5a</i>   | y | 0.84 | 10.7 | 11.4 | 10.6 | 11.0 | 10.8 | 10.8 |
| <b>130</b> | ILMN_1237448 | <i>Maf</i>      | y | 0.85 | 9.2  | 10.9 | 10.0 | 9.6  | 10.2 | 10.2 |
| <b>131</b> | ILMN_1257241 | <i>Cd40lg</i>   | y | 1.29 | 8.5  | 8.3  | 8.7  | 8.5  | 8.9  | 8.8  |
| <b>132</b> | ILMN_2981783 | <i>Ptgds2</i>   | y | 1.35 | 8.0  | 8.1  | 8.5  | 8.3  | 8.7  | 8.9  |
| <b>133</b> | ILMN_2762983 | <i>Tbx21</i>    | y | 1.04 | 9.2  | 8.7  | 8.1  | 9.9  | 8.5  | 8.4  |
| <b>134</b> | ILMN_2667994 | <i>Dnase1l3</i> | y | 0.97 | 7.9  | 8.4  | 8.3  | 8.4  | 8.2  | 8.3  |
| <b>135</b> | ILMN_1259867 | <i>Il21r</i>    | y | 0.93 | 8.1  | 8.3  | 8.2  | 8.3  | 8.1  | 8.2  |
| <b>136</b> | ILMN_2760272 | <i>Rorc</i>     | y | 0.96 | 8.3  | 8.1  | 8.2  | 9.1  | 8.3  | 7.9  |
| <b>137</b> | ILMN_2791459 | <i>Ifng</i>     | y | 1.00 | 7.8  | 8.0  | 7.9  | 8.8  | 8.0  | 7.9  |
| <b>138</b> | ILMN_2741201 | <i>Il17f</i>    | y | 1.12 | 7.7  | 7.5  | 7.6  | 8.1  | 7.8  | 7.6  |
| <b>139</b> | ILMN_1233474 | <i>Il2ra</i>    | y | 0.96 | 8.0  | 7.6  | 7.8  | 8.4  | 7.7  | 7.6  |
| <b>140</b> | ILMN_2919900 | <i>Ascl2</i>    | y | 1.01 | 8.0  | 8.0  | 8.0  | 7.9  | 7.8  | 8.2  |
| <b>141</b> | ILMN_2761900 | <i>Batf</i>     | y | 0.73 | 11.7 | 12.6 | 11.3 | 11.8 | 11.7 | 11.4 |
| <b>142</b> | ILMN_2687169 | <i>Id3</i>      | y | 0.91 | 10.9 | 11.5 | 11.2 | 10.4 | 11.2 | 11.2 |
| <b>143</b> | ILMN_1255743 | <i>Il6ra</i>    | y | 0.98 | 12.3 | 12.5 | 12.3 | 12.1 | 12.5 | 12.3 |
| <b>144</b> | ILMN_2744650 | <i>Prdm1</i>    | y | 1.00 | 7.7  | 7.5  | 7.7  | 7.8  | 7.8  | 7.4  |
| <b>145</b> | ILMN_2789321 | <i>Rc3h1</i>    | y | 0.94 | 9.2  | 9.1  | 9.0  | 9.0  | 9.1  | 8.8  |



**Supplementary Table 2.** Foxp1 deletion leads to increased ICOS expression and Foxo1 activation at early stages of T cell activation.

**a. ICOS MFI (mean fluorescence intensity) in Fig. 6a.**

|       | Foxp1-WT | Foxp1-cKO | <i>P</i> Value* |
|-------|----------|-----------|-----------------|
| Day 1 | 3847     | 8485      | 0.002           |
|       | 3718     | 7473      |                 |
| Day 2 | 5529     | 10978     |                 |
|       | 7366     | 12671     |                 |
|       | 9942     | 15436     |                 |
|       | 9339     | 14598     |                 |

\* Paired student's *t*-Test of combined day 1 and day 2 data between Foxp1-WT and Foxp1-cKO.

**b. ICOS MFI in Fig. 6b.**

|       | OT-II Foxp1-WT | OT-II Foxp1-CKO | <i>P</i> Value* |
|-------|----------------|-----------------|-----------------|
| Day 2 | 1356           | 2977            | 0.007           |
|       | 928            | 2000            |                 |
|       | 1239           | 2197            |                 |
| Day 3 | 2519           | 2908            |                 |
|       | 1874           | 2818            |                 |
|       | 1802           | 2480            |                 |

\* Paired student's *t*-Test of combined day 2 and day 3 data between OT-II Foxp1-WT and OT-II Foxp1-cKO.

**c. Foxo1 MFI in Fig. 6c.**

|  | OT-II Foxp1-WT | OT-II Foxp1-CKO | <i>P</i> Value* |
|--|----------------|-----------------|-----------------|
|  | 11128          | 8290            | 0.009           |
|  | 18021          | 14734           |                 |
|  | 17130          | 13199           |                 |

\* Paired student's *t*-Test.
